# Supplementary material for: Environmental Forest Fire Danger Rating Systems and Indices around the Globe: A Review
Source: MDPI journal article supplement (doi:10.3390/land12010194), 2023-01-06
Supplement: s1 [file s1]

## SUPPLEMENTARY MATERIAL

### Environmental Fire Danger Rating Systems and Indices around the globe: a review

Ioannis Zacharakis, Vassilios A. Tsihrintzis\*

Centre for the Assessment of Natural Hazards and Proactive Planning & Laboratory of Reclamation Works and Water Resources Management, School of Rural, Surveying and Geoinformatics Engineering, National Technical University of Athens, 9 Heroon Polytechniou St., Zographou 15780, Athens, Greece;  
john\_zacharakis@mail.ntua.gr

\*Correspondence: tsihrin@otenet.gr; tsihrin@survey.ntua.gr

In the current section are included all supplementary tables mentioned in the review article that are required for forest fire index calculation and interpretation.

#### S1. Tables

Table S1: CFFDRS danger classes

| FWI Range | Danger Class |
|-----------|--------------|
| >29       | Extreme      |
| 17-29     | Very High    |
| 9-16      | High         |
| 5-8       | Moderate     |
| 2-4       | Low          |
| 0-1       | Very Low     |

Table S2: NFDRS danger classes

| SC    | ERC   | BI     | Danger Class |
|-------|-------|--------|--------------|
| >40   | >60   | >110   | Extreme      |
| 30-40 | 40-60 | 80-110 | High         |
| 15-30 | 20-40 | 40-80  | Moderate     |
| 0-15  | 0-20  | <40    | Low          |

Table S3: Fosberg index danger classes

| FFWI Range | FFWI <sub>m</sub> Range | Danger Class |
|------------|-------------------------|--------------|
| 80 – 100   | > 50                    | Extreme      |
| 60 – 80    |                         | Very High    |
| 50 – 60    |                         | High         |
| < 50       | 25 – 50                 | Moderate     |
|            | < 25                    | Low          |

Table S4: Chandler's burning index danger classes

| <b>CBI Range</b> | <b>Danger Class</b> |
|------------------|---------------------|
| > 97.5           | Extreme             |
| 90.0 – 97.5      | Very High           |
| 75.0 – 90.0      | High                |
| 50.0 – 75.0      | Moderate            |
| < 50.0           | Low                 |

Table S5: LASI calculation and danger classes

| <b>Elevation<br/>(m)</b> | <b>Pressure<br/>Level (hPa)</b> | <b>Stability<br/>(°C)<br/><math>T_{P1} - T_{P2}</math></b> | <b>A-factor</b> | <b>Humidity<br/>(°C)<br/><math>T_{P3} - T_{dP3}</math></b> | <b>B-factor</b> | <b>HI = A + B<br/>Danger Class</b>              |
|--------------------------|---------------------------------|------------------------------------------------------------|-----------------|------------------------------------------------------------|-----------------|-------------------------------------------------|
| < 305 (low)              | P1 = 950                        | < 4°C                                                      | 1               | < 6°C                                                      | 1               | 2-3: very low<br>4: low<br>5: medium<br>6: high |
|                          | P2 = 850                        | 4 - 8°C                                                    | 2               | 6-10°C                                                     | 2               |                                                 |
|                          | P3 = 850                        | ≥ 8°C                                                      | 3               | ≥ 10°C                                                     | 3               |                                                 |
| 305 – 914<br>(medium)    | P1 = 850                        | < 6°C                                                      | 1               | < 6°C                                                      | 1               |                                                 |
|                          | P2 = 700                        | 6 - 11°C                                                   | 2               | 6 - 13°C                                                   | 2               |                                                 |
|                          | P3 = 850                        | ≥ 11°C                                                     | 3               | ≥ 13°C                                                     | 3               |                                                 |
| > 914 (high)             | P1 = 700                        | < 18°C                                                     | 1               | < 15°C                                                     | 1               |                                                 |
|                          | P2 = 500                        | 18 - 22°C                                                  | 2               | 15 - 21°C                                                  | 2               |                                                 |
|                          | P3 = 700                        | ≥ 22°C                                                     | 3               | ≥ 21°C                                                     | 3               |                                                 |

Table S6: Australian systems danger classes

| <b>FFDI</b> | <b>GFDI</b> | <b>FFBT</b> | <b>Danger Class</b> |
|-------------|-------------|-------------|---------------------|
| >50         | 50 – 100    | >240        | Extreme             |
| 25 - 50     | 20 - 50     | 141 - 240   | Very High           |
| 12 - 25     | 7.5 - 20    | 41 - 140    | High                |
| 5 - 12      | 2.5 – 7.5   | 21 - 40     | Moderate            |
| 0 - 5       | <2.5        | <20         | Low                 |

Table S7: Sharples index danger classes

| <b>SFDI Range (for forests)</b> | <b>SFDI Range (for grasslands)</b> | <b>Danger Class</b> |
|---------------------------------|------------------------------------|---------------------|
| > 6.1                           | >7.3                               | Extreme             |
| 2.7 – 6.1                       | 2.9 – 7.3                          | Very High           |
| 1.5 – 2.7                       | 1.2 – 2.9                          | High                |
| 0.7 – 1.5                       | 0.5 – 1.2                          | Moderate            |
| 0.0 – 0.7                       | 0.0 – 0.5                          | Low                 |

Table S8: Lowveld index danger classes

| <b>LFDI Range</b> | <b>Fire Intensity (kJ/s/m)</b> | <b>Danger Class</b> |
|-------------------|--------------------------------|---------------------|
| ≥ 75              | > 3000                         | Extreme             |
| 74 – 60           | 2001 – 3000                    | Very High           |
| 45 – 59           | 1001 – 2000                    | High                |
| 20 – 44           | 500 – 1000                     | Moderate            |
| ≤ 19              | < 500                          | Low                 |

Table S9: FMA and FMA+ alterations in calculation by rain height

| Rain Height (mm) | FMA, FMA <sup>+</sup> alteration in calculation                                          |
|------------------|------------------------------------------------------------------------------------------|
| < 2.5            | No alteration                                                                            |
| 2.5 – 4.9        | Decrease previous day's FMA, FMA <sup>+</sup> by 30% values and add current day's values |
| 5.0 – 9.9        | Decrease previous day's FMA, FMA <sup>+</sup> by 60% values and add current day's values |
| 10.0 – 12.9      | Decrease previous day's FMA, FMA <sup>+</sup> by 80% values and add current day's values |
| > 12.9           | FMA = FMA <sup>+</sup> = 0. Resume calculations the following day.                       |

Table S10: FMA and FMA+ danger classes

| FMA Range  | FMA <sup>+</sup> Range | Danger Classes |
|------------|------------------------|----------------|
| > 20.0     | > 24.0                 | Extreme        |
| 8.1 – 20.0 | 14.1 – 24.0            | High           |
| 3.1 – 8.0  | 8.1 – 14.0             | Moderate       |
| 1.1 – 3.0  | 3.1 – 8.0              | Low            |
| 0.0 – 1.0  | 0.0 – 3.0              | Null           |

Table S11: Rodriguez-Moretti index components

| Temperature<br>°C | Ti   | Wind<br>Speed<br>km/h | Wi   | Relative<br>Humidity % | RHi  | Days<br>without<br>Rain | Ri   |
|-------------------|------|-----------------------|------|------------------------|------|-------------------------|------|
| < 10.0            | 2.5  | < 3.0                 | 1.5  | ≥ 80                   | 2.5  | 1                       | 3.5  |
| 10.0 – 11.9       | 5.0  | 3.0 – 5.9             | 3.0  | 79 – 75                | 5.0  | 2 – 4                   | 7.0  |
| 12.0 – 13.9       | 7.5  | 6.0 – 8.9             | 4.5  | 74 – 70                | 7.5  | 5 – 7                   | 10.5 |
| 14.0 – 15.9       | 10.5 | 9.0 – 11.9            | 6.0  | 69 – 65                | 10.5 | 8 – 10                  | 14.0 |
| 16.0 – 17.9       | 12.0 | 12.0 – 14.9           | 7.5  | 64 – 60                | 12.0 | 11 – 13                 | 17.5 |
| 18.0 – 19.9       | 15.5 | 15.0 – 17.9           | 9.0  | 59 – 55                | 15.5 | 14 – 16                 | 21.0 |
| 20.0 – 21.9       | 17.5 | 18.0 – 20.9           | 10.5 | 54 – 50                | 17.5 | 17 – 19                 | 24.5 |
| 22.0 – 23.9       | 20.0 | 21.0 – 23.9           | 12.0 | 49 – 45                | 20.0 | 20 – 22                 | 28.0 |
| 24.0 – 25.9       | 22.5 | 24.0 – 26.9           | 13.5 | 44 – 40                | 22.5 | 23 – 25                 | 31.5 |
| ≥ 26              | 25.0 | ≥ 27                  | 15.0 | ≤ 39                   | 25.0 | ≥ 26                    | 35.0 |

Table S12: Rodriguez-Moretti index danger classes

| IRM Range | Danger Classes |
|-----------|----------------|
| 75 – 100  | Extreme        |
| 50 – 74   | High           |
| 25 – 49   | Moderate       |
| 0 – 24    | Low            |

Table S13: Risco do Fogo vegetation classes and constant 'A'

| <b>Vegetation Classes</b>              | <b>A</b> |
|----------------------------------------|----------|
| Permanent Wetlands or Broadleaf Forest | 1.50     |
| Deciduous Forest                       | 1.72     |
| Needleleaf or Mixed Forest             | 2.00     |
| Woody Savannas or closed shrubland     | 2.40     |
| Savannas or open shrubland             | 3.00     |
| Croplands or Natural Vegetation        | 4.00     |
| Grassland                              | 6.00     |

Table S14: Risco do Fogo index danger classes

| <b>RF Range</b> | <b>Danger Class</b> |
|-----------------|---------------------|
| > 0.95          | Extreme             |
| 0.70 – 0.95     | High                |
| 0.40 – 0.70     | Moderate            |
| 0.15 – 0.40     | Low                 |
| < 0.15          | Null                |

Table S15: EPI and PEI indices restrictions for day 'i'

| <b>Precipitation (mm)</b> | <b>EPI</b>                  | <b>PEI</b>                           |
|---------------------------|-----------------------------|--------------------------------------|
| <1.0                      | $E_{i-1} + E_i$             | $\sum_{i=1}^t (P_i - E_i)$           |
| 1.0 -2.0                  | $E_{i-1}/P_{i-1} + E_i/P_i$ | $0.75 \bullet PEI_{i-1} + P_i - E_i$ |
| 2.1 - 5.0                 |                             | $0.50 \bullet PEI_{i-1} + P_i - E_i$ |
| 5.1 – 8.0                 |                             | $P_{i-1} - E_{i-1}$                  |
| 8.1 - 10.0                |                             | 0                                    |
| 10.0 -15.0                |                             |                                      |
| > 15.0                    | 0                           |                                      |

Table S16: Thornthwaite's 'K' constant calculation

| <b>Lat</b> | <b>Jan</b> | <b>Feb</b> | <b>Mar</b> | <b>Apr</b> | <b>May</b> | <b>Jun</b> | <b>Jul</b> | <b>Aug</b> | <b>Sep</b> | <b>Oct</b> | <b>Nov</b> | <b>Dec</b> |
|------------|------------|------------|------------|------------|------------|------------|------------|------------|------------|------------|------------|------------|
| 60°N       | 0.54       | 0.67       | 0.97       | 1.19       | 1.33       | 1.56       | 1.55       | 1.33       | 1.07       | 0.84       | 0.58       | 0.48       |
| 50°N       | 0.71       | 0.84       | 0.98       | 1.14       | 1.28       | 1.36       | 1.33       | 1.21       | 1.06       | 0.90       | 0.76       | 0.68       |
| 40°N       | 0.80       | 0.89       | 0.99       | 1.10       | 1.20       | 1.25       | 1.23       | 1.15       | 1.04       | 0.93       | 0.83       | 0.78       |
| 30°N       | 0.87       | 0.93       | 1.00       | 1.07       | 1.14       | 1.17       | 1.16       | 1.11       | 1.03       | 0.96       | 0.89       | 0.85       |
| 20°N       | 0.92       | 0.96       | 1.00       | 1.05       | 1.09       | 1.11       | 1.10       | 1.07       | 1.02       | 0.98       | 0.93       | 0.91       |
| 10°N       | 0.97       | 0.98       | 1.00       | 1.03       | 1.05       | 1.06       | 1.05       | 1.04       | 1.02       | 0.99       | 0.97       | 0.96       |
| 0°         | 1.00       | 1.00       | 1.00       | 1.00       | 1.00       | 1.00       | 1.00       | 1.00       | 1.00       | 1.00       | 1.00       | 1.00       |
| 10°N       | 1.05       | 1.04       | 1.02       | 0.99       | 0.97       | 0.96       | 0.97       | 0.98       | 1.00       | 1.03       | 1.05       | 1.06       |
| 20°N       | 1.10       | 1.07       | 1.02       | 0.98       | 0.93       | 0.91       | 0.92       | 0.96       | 1.00       | 1.05       | 1.09       | 1.11       |
| 30°S       | 1.16       | 1.11       | 1.03       | 0.96       | 0.89       | 0.85       | 0.87       | 0.93       | 1.00       | 1.07       | 1.14       | 1.17       |
| 40°S       | 1.23       | 1.15       | 1.04       | 0.93       | 0.83       | 0.78       | 0.80       | 0.89       | 0.99       | 1.10       | 1.20       | 1.25       |
| 50°S       | 1.33       | 1.19       | 1.05       | 0.89       | 0.75       | 0.68       | 0.70       | 0.82       | 0.97       | 1.13       | 1.27       | 1.36       |

Table S17: Orioux index danger classes

| Orioux water reserve (mm) | Wind Speed (km/h) |          |         |
|---------------------------|-------------------|----------|---------|
|                           | < 20              | 20 - 40  | > 40    |
| < 30                      | Moderate          | High     | Extreme |
| 30 - 50                   | Moderate          | High     | Extreme |
| 50 – 100                  | Moderate          | Moderate | High    |
| 100 - 150                 | Low               | Low      | Low     |

Table S18: Numerical index danger classes

| Numerical Index Range | Danger Classes |
|-----------------------|----------------|
| 15 - 20               | High           |
| 10 – 15               | Moderate       |
| < 10                  | Low            |

Table S19: Portuguese index - rain (r) and wind (w) coefficient estimation

| r   | Precipitation (mm) |  | CW  | Wind Speed (Km/h) |
|-----|--------------------|--|-----|-------------------|
| 1   | $0 < P \leq 1$     |  | 1   | $0 < P \leq 1$    |
| 0.8 | $1 < P \leq 2$     |  | 0.8 | $1 < P \leq 2$    |
| 0.6 | $2 < P \leq 3$     |  | 0.6 | $2 < P \leq 3$    |
| 0.4 | $3 < P \leq 4$     |  | 0.4 | $3 < P \leq 4$    |
| 0.2 | $4 < P \leq 10$    |  | 0.2 | $4 < P \leq 10$   |
| 0.1 | $P > 10$           |  | 0.1 | $P > 10$          |

Table S20: Portuguese index interpretation

| Ifa Range | Danger Classes |
|-----------|----------------|
| $\geq 18$ | Extreme        |
| 13 - 17   | Severe         |
| 9 - 12    | High           |
| 5 - 8     | Moderate       |
| 2 - 4     | Low            |
| 0 - 1     | None           |

Table S21: Lourenco's index – 'R' coefficient values

| R values | Region historical fire danger class | LFDRIs Range |
|----------|-------------------------------------|--------------|
| 1.2      | Extreme                             | $\geq 2.00$  |
| 1.1      | Very High                           | 1.50 – 1.99  |
| 1.0      | High                                | 1.00 – 1.49  |
| 0.9      | Moderate                            | 0.50 – 0.99  |
| 0.8      | Low                                 | 0.00 – 0.49  |

Table S22: ICONA index danger classes

| Ignition Probability | Coastal Areas     |          |          |          |
|----------------------|-------------------|----------|----------|----------|
|                      | Wind Speed (km/h) |          |          |          |
|                      | 0-9               | 10-19    | 20-39    | ≥ 40     |
| $10 \leq 20$         | Low               | Low      | Low      | Moderate |
| $20 \leq 50$         | Low               | Moderate | Moderate | Moderate |
| $50 < 70$            | High              | High     | High     | High     |
| $\geq 70$            | High              | High     | High     | Extreme  |
| Ignition Probability | Hinterland        |          |          |          |
|                      | Wind Speed (km/h) |          |          |          |
|                      | 0-9               | 10-19    | 20-39    | ≥ 40     |
| $10 \leq 20$         | Low               | Moderate | Moderate | Extreme  |
| $20 \leq 50$         | Moderate          | High     | High     | Extreme  |
| $50 < 70$            | High              | High     | High     | Extreme  |
| $\geq 70$            | High              | Extreme  | Extreme  | Extreme  |

Table S23: Italian CFS index danger classes

| CFS Range | Danger Class |
|-----------|--------------|
| 50 - 100  | Extreme      |
| 24 - 50   | Very High    |
| 12 - 24   | High         |
| 5 - 12    | Moderate     |
| 0 - 5     | Low          |

Table S24: IFI danger classes

| IFI – normalized values | Danger Class |
|-------------------------|--------------|
| 5                       | Extreme      |
| 4                       | High         |
| 3                       | Surveillance |
| 2                       | Low          |
| 1                       | Very Low     |

Table S25: Tunisian index danger classes

| DMRIF Range     |                | Danger Class |
|-----------------|----------------|--------------|
| $N_d \leq 6$    | $N_d > 6$      |              |
| $< -5500$       | $< -100$       | Null         |
| $-5500$ to $-6$ |                | Low          |
| $-6$ to $100$   | $-100$ to $25$ | High         |
| $> 100$         | $> 25$         | Severe       |

Table S26: Angstrom index danger classes

| Angstrom Index Range | Danger Class |
|----------------------|--------------|
| $< 2.0$              | Extreme      |
| $2.0 - 2.5$          | High         |
| $2.5 - 4.0$          | Low          |
| $> 4.0$              | Null         |

Table S27: Baumgartner index danger classes

| Month     | Danger Classes |         |          |         |           |
|-----------|----------------|---------|----------|---------|-----------|
|           | Very Low       | Low     | Moderate | High    | Very High |
| March     | < 3            | 3 - 5   | 5 - 9    | 9 - 15  | > 15      |
| April     | < 3            | 3 - 8   | 8 - 16   | 16 - 27 | > 27      |
| May       | < 3            | 3 - 16  | 16 - 25  | 25 - 35 | > 35      |
| June      | < 12           | 12 - 24 | 24 - 32  | 32 - 41 | > 41      |
| July      | < 12           | 12 - 24 | 24 - 31  | 31 - 40 | > 40      |
| August    | < 8            | 8 - 20  | 20 - 28  | 28 - 37 | > 37      |
| September | < 6            | 6 - 18  | 18 - 26  | 26 - 35 | > 35      |

Table S28: Telicyn Logarithmic index danger classes

| Telicyn Logarithmic Range | Danger Classes |
|---------------------------|----------------|
| > 15.0                    | Extreme        |
| 5.0 – 15.0                | High           |
| 3.6 – 5.0                 | Moderate       |
| 2.1 – 3.5                 | Low            |
| < 2.0                     | Null           |

Table S29: Zhdanko index - precipitation coefficient values

|                |     |           |           |           |            |             |         |
|----------------|-----|-----------|-----------|-----------|------------|-------------|---------|
| P (mm)         | 0.0 | 0.1 – 0.9 | 1.0 – 2.9 | 3.0 – 5.9 | 6.0 – 14.9 | 15.0 – 19.0 | > 19.0. |
| K <sub>t</sub> | 1.0 | 0.8       | 0.6       | 0.4       | 0.2        | 0.1         | 0.0     |

Table S30: Nesterov indices danger classes

| Nesterov Indices Range | Danger Class |
|------------------------|--------------|
| > 10 000               | Extreme      |
| 4001 – 10000           | High         |
| 1001 – 4000            | Moderate     |
| 301 – 1000             | Low          |
| < 300                  | Null         |

Table S31: M68 index - coefficients

|                | P <sub>t</sub> < 1 | 1 ≤ P <sub>t</sub> < 5<br>S <sub>t</sub> <sup>1</sup> ≥ 1 | 5 ≤ P <sub>t</sub> < 10<br>S <sub>t</sub> <sup>1</sup> ≥ 1 | P <sub>t</sub> ≥ 10<br>S <sub>t</sub> <sup>1</sup> ≥ 1 | P <sub>t</sub> ≥ 20 | P <sub>t</sub> < 20<br>P <sub>(t1&amp;t2&amp;t3)</sub> ≥ 20 | P <sub>(t&amp;t1&amp;t2&amp;t3)</sub> < 20 | t < t <sub>1</sub> | t <sub>1</sub> < t < t <sub>2</sub> | t <sub>2</sub> < t < t <sub>3</sub> | t > t <sub>3</sub> |
|----------------|--------------------|-----------------------------------------------------------|------------------------------------------------------------|--------------------------------------------------------|---------------------|-------------------------------------------------------------|--------------------------------------------|--------------------|-------------------------------------|-------------------------------------|--------------------|
| k <sub>1</sub> | 1                  | 0.5                                                       | 0.25                                                       | 0                                                      | -                   | -                                                           | -                                          | -                  | -                                   | -                                   | -                  |
| k <sub>2</sub> | -                  | -                                                         | -                                                          | -                                                      | 0                   | 0.5                                                         | 1                                          | -                  | -                                   | -                                   | -                  |
| k <sub>3</sub> | -                  | -                                                         | -                                                          | -                                                      | -                   | -                                                           | -                                          | 3                  | 2                                   | 1                                   | 0.5                |

<sup>1</sup> P<sub>t</sub> corresponds to precipitation on day t in mm and S<sub>t</sub> to snow cover in cm on day t, t<sub>1</sub> is the period when birch has its first leaves, t<sub>2</sub> is the period when the first rainfall greater than 5mm occurs after robinia's first blossom and t<sub>3</sub> is the period when the first rainfall greater than 5mm occurs after the 14<sup>th</sup> of August but earlier than the 1<sup>st</sup> of September.

Table S32: M68 index danger classes

| <b>M68 Range</b> | <b>Danger Class</b>           |
|------------------|-------------------------------|
| > 7000           | Extreme (probability > 60%)   |
| 4000 - 7000      | High (probability 40-60%)     |
| 2000 – 4000      | Moderate (probability 20-40%) |
| 500 – 2000       | Low (probability <20%)        |
| ≤ 500            | Null (probability <3%)        |

Table S33: Modified M68 index danger classes

| Mm68      | Wind speed ≤ 29km/h | Wind speed > 29km/h |
|-----------|---------------------|---------------------|
| > 700     | Extreme             | Extreme             |
| 501 – 700 | High                | High                |
| 301 - 500 | Moderate            |                     |
| 151 - 300 | Low                 | Moderate            |
| 101 - 150 |                     | Low                 |
| 51 - 100  | Null                |                     |
| ≤ 50      |                     | Null                |

Table S34: Finnish index danger classes

| <b>FFI</b> | <b>Volume Moisture</b> | <b>Moisture status</b> | <b>Danger Class</b> |
|------------|------------------------|------------------------|---------------------|
| 6.0        | 0.10                   | Very Dry               | High                |
| 5.0 – 5.9  | 0.11 – 0.14            | Dry                    | Moderate            |
| 4.0 – 4.9  | 0.15 – 0.19            | Moderately Dry         |                     |
| 3.0 – 3.9  | 0.20 – 0.25            | Moderately Wet         | Low                 |
| 2.0 – 2.9  | 0.26 – 0.32            | Wet                    |                     |
| 1.0 – 1.9  | 0.33 – 0.50            | Very Wet               |                     |

Table S35: Keetch and Byram index danger classes

| <b>KBDI</b> | <b>Danger Class</b> |
|-------------|---------------------|
| 600 - 800   | Extreme             |
| 400 - 600   | High                |
| 200 – 400   | Moderate            |
| 0 - 200     | Low                 |

Table S36: SDI - vegetation classes

| <b>Vegetation Class</b> | <b>O</b> | <b>A</b> | <b>B</b> | <b>C</b> | <b>D</b> | <b>E</b> | <b>F</b> |
|-------------------------|----------|----------|----------|----------|----------|----------|----------|
| R                       | 0        | 0.1      | 0.2      | 0.3      | 0.4      | 0.5      | 0.6      |
| C                       | 0        | 0.5      | 1.0      | 2.0      | 2.5      | 3.5      | 4.0      |
| W                       | 0        | 0.5      | 0.5      | 0.5      | 0.5      | 0.5      | 1.0      |
| FR                      | 1/10     | 1/20     | 1/30     | 1/40     | 1/50     | 1/60     | 1/70     |



Table S37: Soil dryness index danger classes

| <b>SDI Range</b> | <b>Danger Class</b> |
|------------------|---------------------|
| >1200            | Extreme             |
| 801 - 1200       | Very High           |
| 601 - 800        | High                |
| 401 - 600        | Moderate            |
| 251 - 400        | Low                 |
| 0 - 250          | Very Low            |

Table S38: Soil's water content at field capacity and at wilting point

| <b>Soil Type (USA Classification)</b> | <b><math>\theta_{FC}</math> (m<sup>3</sup>/m<sup>3</sup>)</b> | <b><math>\theta_{WP}</math> (m<sup>3</sup>/m<sup>3</sup>)</b> | <b><math>\theta_{FC}-\theta_{WP}</math> (m<sup>3</sup>/m<sup>3</sup>)</b> |
|---------------------------------------|---------------------------------------------------------------|---------------------------------------------------------------|---------------------------------------------------------------------------|
| Sand                                  | 0.07 – 0.17                                                   | 0.02 – 0.07                                                   | 0.05 – 0.11                                                               |
| Loamy Sand                            | 0.11 – 0.19                                                   | 0.03 – 0.10                                                   | 0.06 – 0.12                                                               |
| Sandy Loam                            | 0.18 – 0.28                                                   | 0.06 – 0.16                                                   | 0.11 – 0.15                                                               |
| Loam                                  | 0.20 – 0.30                                                   | 0.07 – 0.17                                                   | 0.13 – 0.18                                                               |
| Silt Loam                             | 0.22 – 0.36                                                   | 0.09 -0.21                                                    | 0.13 – 0.19                                                               |
| Silt                                  | 0.28 – 0.36                                                   | 0.12 – 0.22                                                   | 0.16 – 0.20                                                               |
| Silt Clay Loam                        | 0.30 – 0.37                                                   | 0.17 – 0.24                                                   | 0.13 – 0.18                                                               |
| Silt Clay                             | 0.30 – 0.42                                                   | 0.17 – 0.29                                                   | 0.13 – 0.19                                                               |
| Clay                                  | 0.32 – 0.40                                                   | 0.20 – 0.24                                                   | 0.12 – 0.20                                                               |

Table S39: Palmer's index interpretation

| <b>PDSI Range</b> | <b>Drought Danger Class</b> |
|-------------------|-----------------------------|
| $\geq 4.00$       | Extremely Wet               |
| 3.00 to 3.99      | Very Wet                    |
| 2.00 to 2.99      | Moderately Wet              |
| 1.00 to 1.99      | Slightly Wet                |
| 0.50 to 0.99      | Incipient Wet Spell         |
| 0.49 to -0.49     | Near Normal                 |
| -0.50 to -1.00    | Incipient Drought           |
| -1.00 to -1.99    | Mild Drought                |
| -2.00 to -2.99    | Moderate Drought            |
| -3.00 to -3.99    | Severe Drought              |
| $\leq -4.00$      | Extreme Drought             |

Table S40: Reconnaissance drought index

| <b>RDI's Range</b> | <b>Drought Danger Class</b> |
|--------------------|-----------------------------|
| < -2.0             | Extreme                     |
| -1.5 to -2.0       | Severe                      |
| -1.0 to -1.5       | Moderate                    |
| -0.5 to -1.0       | Mild                        |

Table S41: NFDRS fuel models for FPI

| NFDRS Fuel Type | Live Fuel Load | Dead Fuel Load | Extinction Moisture % | Vegetation Description         |
|-----------------|----------------|----------------|-----------------------|--------------------------------|
| A               | 0.67           | 0.45           | 15                    | Western annual grasses         |
| B               | 25.73          | 17.93          | 15                    | California mixed chaparral     |
| C               | 2.91           | 3.14           | 20                    | Pine grass savannah            |
| D               | 8.41           | 6.73           | 30                    | Southern rough                 |
| F               | 20.18          | 13.45          | 15                    | Intermediate brush             |
| G               | 29.14          | 21.30          | 25                    | Short needle conifers (heavy)  |
| H               | 6.73           | 10.09          | 20                    | Short needle conifers (normal) |
| L               | 1.12           | 0.56           | 15                    | Western perennial grasses      |
| N               | 4.48           | 6.73           | 25                    | Sawgrass or thick grass        |
| O               | 20.18          | 17.93          | 30                    | High pocosin                   |
| P               | 3.36           | 4.48           | 30                    | Southern pine plantation       |
| Q               | 12.33          | 14.57          | 25                    | Alaskan black spruce           |
| R               | 2.24           | 3.36           | 25                    | Hardwoods                      |
| S               | 3.36           | 3.36           | 25                    | Alpine tundra                  |
| T               | 6.73           | 3.36           | 15                    | Sagebrush grass mixture        |
| U               | 2.24           | 7.85           | 20                    | Western long needle conifer    |

Table S42: FPI - equilibrium moisture content input corrections

| Variable | Cloudiness in % |         |         |         |
|----------|-----------------|---------|---------|---------|
|          | 0.0 – 0.1       | 0.1-0.5 | 0.6-0.9 | 0.9-1.0 |
| T (°F)   | + 25            | + 19    | + 12    | + 5     |
| RH (%)   | - 0.75          | - 0.83  | -0.91   | -1.00   |

## S2. Analytical Computations

### S2.1 Fosberg computations

Fosberg original equations are given below [1,2]:

$$FFWI = \frac{\eta(1+w^2)^{0.5}}{0.3002} \quad (S1)$$

where FFWI is Fosberg's fire weather index,  $\eta$  represents a coefficient calculated by Eq. (S3) and W is wind speed (mi/h)

$$m = 0.03229 + 0.281073 RH - 0.000578 RH T, \text{ if } RH < 10\% \quad (S2a)$$

$$m = 2.22749 + 0.160107 RH - 0.01478 T, \text{ if } 10\% \leq RH \leq 50\% \quad (S2b)$$

$$m = 21.0606 + 0.005565 RH^2 - 0.00035 RH T - 0.483199 RH, \text{ if } RH > 50\% \quad (S2c)$$

where RH is the relative humidity (%) and T is dry bulb air temperature (°F).

Fosberg in S.I. units is given below:

$$\eta = 1 - 2(m/30) + 1.5(m/30)^2 - 0.5(m/30)^3 \quad (S3)$$

$$m = 0.03229 + 0.281073RH - 0.000578RH(1.8T + 32), \text{ if } RH < 10\% \quad (S4a)$$

$$m = 2.22749 + 0.160107RH - 0.01478(1.8T + 32), \text{ if } 10\% \leq RH \leq 50\% \quad (S4b)$$

$$m = 21.0606 + 0.005565RH^2 - 0.00035RH(1.8T+32) - 0.483199RH, \text{ if } RH > 50\% \quad (S4c)$$

### S2.2 Australian indices computations

The computational procedure of the FFDI components is presented below [3]:

$$DF = 0.191(I + 104) \frac{(N+1)^{1.5}}{(3.52(N+1)^{1.5} + P - 1)} \quad (S5a)$$

where I is a drought index – either SDI or KBDI (with the latter being the most used and N the number of days since the last rainfall event.

An improved method for DF calculation has been provided in the literature [4]:

$$DF = \max[10.5(1 - e^{\frac{(30-I)}{40}})(\frac{y+42}{y^2+3y+42}, 10] \quad (S5b)$$

where y can be calculated as follows:

$$y = \frac{P-2}{N^{1.3}}, \text{ if } N \geq 1 \text{ \& } P > 2, \quad (S6)$$

$$y = \frac{P-2}{0.8^{1.3}}, \text{ if } N = 0 \text{ \& } P > 2,$$

$$y = 0, \text{ if } P \leq 2.$$

The other two grassland indices ('Mark 3' and 'Mark 4') can be calculated as follows:

$$GFDI_3 = 2e^{(-23.6 + 5.01\ln(C) + 0.0281T - 0.226\sqrt{RH} + 0.633\sqrt{W})} \quad (S7a)$$

$$GFDI_4 = \exp(-1.523 + 1.027\ln Q - 0.009432(100 - C)^{1.536} + 0.02764T + 0.6422\sqrt{W} - 0.2205\sqrt{RH}) \quad (S7b)$$

$$GFDI_5 = 3.3F_w e^{(-0.0897M + 0.0403W)}, \text{ if } M < 18.8\% \quad (S7c)$$

$$GFDI_5 = 0.299F_w(30-M)e^{(-1.686 + 0.0403W)}, \text{ if } 18.8 \leq M < 30 \quad (S7d)$$

where C is the degree of curing (%) of grass where 100% corresponds to fully dry grassland, and Q describes fuel quantity (t/ha) in the range of 1 to 6 which correspond to "Very Sparse" and "Heavy", respectively. GFDI<sub>4</sub> is an improvement of GFDI<sub>3</sub>, as fuel quantity is considered stable and equal to 4.5 t/ha in the latter; however, in the current study both indices are included. F<sub>w</sub> represents fuel weight with an average value of 5 t/ha, and M is given by the following equation in which C is the degree of curing:

$$M = \frac{(97.7+4.06RH)}{T+6} - 0.00854RH + \frac{3000}{C} - 30 \quad (S8)$$

The main equation of FFBT is given below [5,6]:

$$FFBT = Y + Ze^{W_2N} \quad (S9)$$

Where, for jarrah tree types:

$$Y = 21.37 - 3.42M + 0.085M^2 \quad (S10a)$$

$$Z = 48.09Me^{-0.6M} + 11.9 \quad (S11a)$$

$$W_2 = rW \quad (S12a)$$

$$N = -0.096M^{1.05} + 0.44 \quad (S13a)$$

where r is the wind ratio factor assigned based on wind ratio, and M is the moisture content as defined and computed in [5].

Or, for karri tree types:

$$Y = 4.88 - 263.78M^{1.8} \quad (S10b)$$

$$Z = 163.4M^{-1.18} \quad (S11b)$$

$$W_2 = rW \quad (S12b)$$

$$N = -0.059M + 0.54 \quad (S13b)$$

### S2.3 Lowveld index computations

The three factors presented in the respective review article can be computed as follows [7,8]:

$$BI = T - 35 - \left[ \frac{35-T}{30} \right] + 0.37(100 - RH) + 30 \quad (S14a)$$

$$WF = -0.0000227W^4 + 0.0026348W^3 - 0.09087W^2 + 1.65W + 0.2 \quad (S14b)$$

$$RCF = 0.62 - 0.0342P + 0.000609P^2 - 0.000004P^3 + 0.1761D - 0.01141D^2 + 0.000279D^3 \quad (S15)$$

where T is the dry bulb air temperature (°C), RH is the relative humidity (%), W is wind speed (km/h), P is the last precipitation depth (mm), and D is the number of days since the last rainfall event.

### S2.4. Risco do Fogo computations

$$\begin{aligned} f_{p1} &= \exp(-0.14 \bullet \sum_{i=1}^1 Pi) \\ f_{p2} &= \exp(-0.07 \bullet [\sum_{i=1}^2 Pi - \sum_{i=1}^1 Pi]) \\ f_{p3} &= \exp(-0.04 \bullet [\sum_{i=1}^3 Pi - \sum_{i=1}^2 Pi]) \\ f_{p4} &= \exp(-0.03 \bullet [\sum_{i=1}^4 Pi - \sum_{i=1}^3 Pi]) \\ f_{p5} &= \exp(-0.02 \bullet [\sum_{i=1}^5 Pi - \sum_{i=1}^4 Pi]) \\ f_{p6\_10} &= \exp(-0.01 \bullet [\sum_{i=1}^{10} Pi - \sum_{i=1}^5 Pi]) \\ f_{p11\_15} &= \exp(-0.008 \bullet [\sum_{i=1}^{15} Pi - \sum_{i=1}^{10} Pi]) \\ f_{p16\_30} &= \exp(-0.004 \bullet [\sum_{i=1}^{30} Pi - \sum_{i=1}^{15} Pi]) \\ f_{p31\_60} &= \exp(-0.002 \bullet [\sum_{i=1}^{60} Pi - \sum_{i=1}^{30} Pi]) \\ f_{p61\_90} &= \exp(-0.001 \bullet [\sum_{i=1}^{90} Pi - \sum_{i=1}^{60} Pi]) \\ f_{p91\_120} &= \exp(-0.0007 \bullet [\sum_{i=1}^{120} Pi - \sum_{i=1}^{90} Pi]) \end{aligned} \quad (S16)$$

where  $f_p$  is the precipitation factor defined for the following set of days: {1, 2, 3, 4, 5, 6-10, 11-15, 16-30, 31-60,

60-90, 90-120}, and  $P_i$  is the amount of precipitation on day  $i$ .

The period of drought – an important vegetation indicator - is estimated by the following equation [9-12]:

$$PD = 105 \prod f_i \quad (S17)$$

where  $PD$  is the period of drought and  $f_i$  is the precipitation factor for the corresponding period 'i'.

Afterwards, the basic fire risk can be computed in accordance with Eq. (S18) [11]:

$$R_{bn} = 0.4 \{1 + \sin[(A \cdot PD - 90)(3.14/180)]\} \quad (S18)$$

where  $R_{bn}$  is the basic risk fire,  $PD$  is the drought period mentioned above and  $A$  is a constant based on vegetation type defined in Table S13. Eqs. (25) to (27) are used in order to estimate the observed fire risk [9-12]:

$$FRH = -0.006RH + 1.3 \quad (S19)$$

$$FT = 0.02T_{max} + 0.4 \quad (S20)$$

$$R_{Fo} = R_{bn} \cdot FRH \cdot FT \quad (S21)$$

where  $FRH$  and  $FT$  correspond to relative humidity and maximum dry bulb air temperature factors, respectively, and  $R_{Fo}$  is the observed fire risk.

Ultimately, the observed fire risk must be corrected due to latitude and topography characteristics, based on Eqs. (28) to (30) [9-12]:

$$FLAT = (1 + 0.003\text{abs}(\text{lat})) \quad (S22)$$

$$FELV = 1 + 0.00003\text{elv} \quad (S23)$$

## S2.5 Thornthwaite's equation

The Potential evapotranspiration (PET) can be estimated by the following equations [13-15]:

$$ETP = K[1.6(10^{\frac{T_i}{I}})^{\alpha}] \quad (S24)$$

where  $K$  is a constant defined in Table S16,  $T_i$  is the average monthly temperature for month  $i$  and  $I$ ,  $\alpha$  can be calculated as follows:

$$I = \sum_{i=1}^{12} \left(\frac{T_i}{5}\right)^{1.514} \quad (S25)$$

$$\alpha = 0.000000675I^3 - 0.0000771I^2 + 0.01792I + 0.49239 \quad (S26)$$

Finally, the superficial water reserve is computed according to the next equation:

$$rs = 10^{((15 - \Sigma ETP)/15)} \quad (S27)$$

where  $\Sigma ETP$  is the potential evapotranspiration sum of previous and current day.

## S2.6 Numerical index calculations

Firstly, the false humidity factor (FHR) must be calculated [16-18]:

$$FHR = \frac{100E_{sat}(T_{dew})}{E_{sat}(T_{soil})} \quad (S28)$$

where  $E_{sat}$  is the saturated vapor pressure,  $T_{dew}$  is dew point temperature and  $T_{soil}$  is soil's temperature. Then the coefficient for soil water reserve ( $C_{res}$ ) as well as the coefficient of wind ( $C_{vent}$ ) and the correction coefficient ( $A$ ) must be calculated:

$$C_{res} = 3 + 2\text{tanh}\left(\frac{r-50}{25}\right) \quad (S29)$$

where  $\text{tanh}$  is the hyperbolic tangent and  $r$  is Orioux's water reserve index.

$$C_{vent} = 3 + 3 \tanh\left(\frac{45-W}{50}\right) \quad (S30)$$

where W is wind speed.

A = -3 if ROS (rate of spread) ≤ 600, A = 2 if ROS ≥ 1000 and A = 0 in all other cases. Rate of spread can be calculated by the formula below:

$$ROS = 180e^{1714T} \tanh\left(\frac{100-r}{150}\right) \{1 + 2[0.8483 + \tanh\left(\frac{W}{30} - 1.25\right)]\} \quad (S31)$$

The authors in the original publications do not clarify the method of estimating the parameters in equation 45. However, the following equations can be used [19,20]:

$$E_{sat} = 0.6108e^{\frac{17.27T}{T+237.3}} \quad (S32)$$

where T is mean temperature – produced by the half sum of maximum and minimum temperatures.

$$T_{dew} = \frac{116.91 + 237.3 \ln(E_a)}{16.78 - \ln(E_a)} \quad (S33)$$

where  $E_{act}$  is actual vapor pressure and can be calculated as follows:

$$E_{act} = E_{sat} \cdot \frac{RH}{100} \quad (S34)$$

with RH being the Relative Humidity (0-100%).

Eventually,  $T_{soil}$  can be found based on the following formula:

$$T_{soil} = 0.874T - 0.189W + 21.38, \text{ if } C_c \leq 2 \quad (S35)$$

$$T_{soil} = 1.36T - 1.422C_c - 0.22 T_{dew} + 13.42, \text{ if } C_c \geq 3 \quad (S36)$$

where W is wind speed, T is dry bulb air temperature  $C_c$  is cloud coverage in octas and  $T_{dew}$  is dew point temperature.

## S2.7 Portuguese indices computations

The Portuguese index is based on the next equations [21-23]:

$$I_i = T_i(T_i - T_{dew,i}) \quad (S37)$$

where  $T_i$  is dry bulb air temperature on day i and  $T_{dew,i}$  = dew point temperature on day i.

$$I_{a(i-1)} = r \sum_{i=1}^{n-1} I_i \quad (S38)$$

where r is a rain coefficient of previous day precipitation, as described in Table S19 - alongside with the CW factor.

In addition, Lourenço's fire danger risk indices variations can be computed as follows:

$$LFDRI_{max} = \frac{T_{max}}{RH_{max}} \quad (S39)$$

A modification of the original index can be achieved by introducing wind speed in the equation:

$$LFDRI_m = \frac{T}{RH} + W_c \quad (S40)$$

where  $W_c$  is a wind speed coefficient. The coefficient value for wind led to a second version of the modified equation, in which  $W_c$  was replaced by the division of wind speed by 100, including only the values of wind that form clockwise angles with the North direction from 0° to 180° and 350° to 360°:

$$LFDRI_{m100} = \frac{T}{RH} + \frac{W}{100} \quad (S41)$$

## S2.8 ICONA calculations

In the first step, the estimation of Fine Dead Fuel Moisture Content (FDFMC) is required, according to "TABLA II.1" of the original publication, combining relative humidity and dry bulb air temperature [24].

Then, Summing Corrector (SC) is defined by “TABLA II.2”, “TABLA II.3”, “TABLA II.4” and “TABLA II.5”, depending on current month, time, slope, aspect and cloudiness percentage, and is added to FDFMC. Next, the Adjusting Factor of Wind (AFW) can be concluded based on fuel model type, according to “CUADRO I”, as well as the Multiplication Factor of Wind (MFW), in section 8 of the original publication, which is related to current and approximating slope - where fire is heading.

Afterwards, Ignition Probability (IP) - one of the basic outputs of the system – is estimated according to “TABLA III” combining FDFMC plus SC value, cloud percentage and dry bulb air temperature.

Index categorization is, finally, based on “TABLA IV”, combining IP and Corrected Wind (CW) and differs for coastal and hinterland areas. CW is defined by the following equation:

$$CW = W \bullet AFW \bullet MFW \quad (S42)$$

## S2.9 Italian indices calculations

For the estimation of CFS, the soil water deficit must be estimated firstly, according to Eq. (S43):

$$IS_i = IR_i + AS \quad (S43)$$

where  $IS_i$  is water deficit on day  $i$ ,  $IR_i$  is reduced water deficit on the same day and  $AS$  is increase in water deficit.

$$IR_i = IS_{i-1} - P_{net} \quad (S44)$$

where  $IS_{i-1}$  is previous day's water deficit and  $P_{net}$  is net rainfall, calculated as follows:

$$P_{net} = P - 5 \quad (S45)$$

where  $P$  is the total amount of rain and 5mm are considered to be the amount of rain intercepted by trees' canopy.

The estimation of  $AS$  is based on “Table 6” in the original publication and is a function of maximum dry bulb air temperature and  $IR_i$ . The last parameter needed for the ultimate index is drought code ( $Ar$ ), which can be produced by tables from the original publication as a relation of  $IS_i$ , the number of days since last rainfall event and the amount of precipitation.

The computational procedure of IFI starts with drought code (DC):

$$DC = \frac{e^{\frac{0.261Rg \cdot T}{\lambda}}}{1 + \left( P_a + (P_{c100})^{\frac{1}{3}} \right)^{0.5}} \quad (S46)$$

where  $Rg$  represents global daily solar radiation ( $W/m^2$ ),  $T$  represents mean daily dry bulb air temperature ( $^{\circ}C$ ),  $\lambda$  is the latent heat of evaporation ( $J/g$ ),  $P_a$  is daily rain height (mm) and  $P_{c100}$  is total rainfall height of the last 4 days – or 100 hours (mm). DC values range from 0.1 to 5 with the highest values indicating higher fire danger risk (Sirca et al., 2018).

The MC parameter calculation differs in the relative literature. According to Spano et al. (2001) [25]:

$$MC = 0.14 e^{(0.05T + 0.1W - 0.062(RH - 50))} \quad (S47a)$$

where  $T$  represents dry bulb air temperature,  $W$  the wind speed and  $RH$  the relative humidity.

According to Sirca et al. (2007) and Sirca et al. (2018) [26,27]:

$$MC = 0.14 [e^{(0.0625T_{max})} + e^{(0.1W_{max})} + e^{(RH_{min})}] \quad (S48b)$$

where  $T_{max}$  is the maximum dry bulb air temperature,  $W_{max}$  is maximum wind speed and  $RH_{min}$  is minimum relative humidity.

$$FC = LAI \bullet LAD \bullet DW \quad (S49)$$

where  $LAI$  is Leaf Area Index (tree canopy area/ground area),  $LAD$  is Leaf Area Density (in  $m^2 / m^3$ ) and  $DW$  is fuel moisture content ranging from 0 (maximum water concentration) and 1 (minimum water

concentration). The estimation of FC prerequisites the classification of fuel types. However, the computational procedure is not clear in the respective literature, thence it is concluded that any scientific method for calculating these three parameters is accepted for FC estimation [27].

$$TC = S \cdot V_p \cdot R_g \cdot VE \quad (S50)$$

where  $S$  is terrain slope,  $V_p$  is the angle between wind direction and maximum terrain slope projection,  $R_g$  is global solar radiation and  $VE$  is East-West orientation [26].

Finally, the  $R$  coefficient varies according to maximum daily solar radiation values ( $R_{gmax}$ ):

$$R = 0.24 \text{ if } R_{gmax} < 400 \text{ W/m}^2$$

$$R = 0.32 \text{ if } 400 \text{ W/m}^2 \leq R_{gmax} \leq 800 \text{ W/m}^2$$

$$R = 1 \text{ if } R_{gmax} > 800 \text{ W/m}^2$$

## S2.10 Nesterov modifications

The first modification of Nesterov index is presented below [28]:

$$NI_{t,m} = k_1 \cdot NI_{t-1} + k_2 \cdot (T_t - T_{dew,t}) T_t \quad (S51)$$

where  $NI_{t-1}$  is previous day's index and  $k_1$ ,  $k_2$  are two coefficients estimated as follows:

$k_1 = 1$  if  $P_t = 0\text{mm}$ ,  $k_1 = 0.5$  if  $0 < P_t < 1$  or  $k_1 = 0$  if  $P_t = 0\text{mm}$ , where  $P_t$  is the precipitation height on current day (day  $t$ ).

$k_2 = 0.25$  if there was a rainfall event with height greater than 5mm in the past 5 days, or  $k_2 = 1$  if there was no day in the past 5 days with a rain height greater than 5mm.

The second modification of the Nesterov Index, applied in Russia, is the Zhdanko Index, computed according to Eq. (S52) [29,30]:

$$Zh_t = Zh_{t-1} + (T_t - T_{dew,i}) \cdot K_t \quad (S52)$$

where  $Zh_t$  is the Zhdanko index on day  $t$ ,  $Zh_{t-1}$  is previous day's index,  $T_t$  is dry bulb air temperature at 15:00 local time,  $T_{dew,i}$  is dew point temperature at 15:00 local time and  $K_t$  is a coefficient in case any precipitation occurs on current day  $t$ , estimated as in Table S29.

## S2.11 M68 Modifications

The modifications of M68 index are presented below:

$$M68_t = k_3 \cdot \{k_1 \cdot M68_{t-1} + \max(0, k_2 \cdot (T_t + 10) \cdot \Delta e_t)\} \quad (S53)$$

where  $M68_t$  is M68 index on day  $t$ ,  $M68_{t-1}$  is previous day's M68 index,  $T_t$  is dry bulb air temperature on day  $t$ ,  $\Delta e_t$  is vapor pressure deficit and  $k_1, k_2, k_3$  are the coefficients mentioned above. Vapor pressure deficit is calculated as the difference between saturation and actual vapor pressure [19]:

$$\Delta e_t = e_s - e_a \quad (S54)$$

where  $e_s$  and  $e_a$  are saturated and actual vapor pressure, computed as shown in paragraph S2.4. The estimation of the three coefficients is analyzed in Table S31. The categorization of the index is shown in Table S32 [28,31,32]. The modified version of M68 – used by German Weather Service (DWD) is given by the following equation [33]:

$$Mm68_t = k_3 \{k_1 \cdot Mm68_{t-1} + \max(0, \frac{k_2 [T_t + k_4]}{10}) \Delta e_t\} \quad (S55)$$

where  $Mm68_t$  is current day Modified M68 index,  $Mm68_{t-1}$  is previous day's Modified M68 index,  $k_1, k_2, k_3$   $\Delta e_t$  and  $T_t$  as in Eq. (S53) and  $k_4$  is a coefficient depending on vapor pressure deficit range and in more detail,  $k_4 = 10$  if  $RH > 66$ ,  $k_4 = 20$  if  $26 < RH \leq 66$  or  $k_4 = 30$  if  $RH < 26$ .



## S2.12 Finnish index calculations

The first component needed to be estimated is the potential evaporation [34]:

$$E_{\text{pot}} = \frac{\Delta \cdot R_n + \Delta e \left( \rho \frac{c_p}{r_a} + b \right)}{\Delta + \gamma \cdot \lambda \left( 1 + \frac{b \cdot r_a}{\rho \cdot c_p} \right)} \quad (\text{S56a})$$

where  $E_{\text{pot}}$  is potential evaporation in  $\text{kg}/(\text{m}^2\text{s})$ ,  $\Delta$  represents the gradient of the saturation water vapor pressure versus temperature curve in  $\text{hPa}/\text{K}$ ,  $R_n$  is net radiation in  $\text{W}/\text{m}^2$ ,  $\rho$  stands for air density (equals to  $1.2923 \text{ kg}/\text{m}^3$ ,  $c_p$  is the specific air heat (equals to  $1004 \text{ J}/[\text{kg} \cdot \text{K}]$ ),  $b$  is a correction multiplier for measuring height – not well documented in the original publication – in  $\text{W}/(\text{m}^2\text{K})$ ,  $r_a$  is the aerodynamic resistance,  $\Delta e$  is vapor pressure deficit in  $\text{hPa}$ ,  $\gamma$  is a psychrometer constant (equals to  $0.66 \text{ hPa}/\text{K}$ ) and  $\lambda$  is the latent heat of vaporization (equals to  $2.5 \cdot 10^6 \text{ J}/\text{kg}$ ). However, the  $E_{\text{pot}}$  has been documented in a more uniform version as in equation S23b [19,35]:

$$E_{\text{pot}} = \frac{\Delta(R_n - G) + \frac{\rho \cdot c_p \Delta e}{r_a}}{\lambda \left[ \Delta + \gamma \left( 1 + \frac{r_s}{r_a} \right) \right]} \quad (\text{S56b})$$

where  $G$  is the soil heat flux density in  $\text{MJ}/(\text{m}^2 \cdot \text{day})$ ,  $r_s$  is bulk surface resistance and all other parameters as in equation (S23a), with the exception of  $c_p$  which equals to  $1.013 \cdot 10^{-3} \text{ MJ}/(\text{kg}^\circ\text{C})$ .

$$\Delta = \frac{4098 - 0.6108 e^{\frac{17.27T}{T+237.3}}}{(T+237.3)^2} \quad (\text{S57})$$

where  $T$  is dry bulb air temperature in  $^\circ\text{C}$ .

$R_n$  and  $G$  can be either measured or estimated as in Allen et al. (1998) [19] – Chapter 3. Eventually,  $r_a$  and  $r_s$  can be computed as follows [19]:

$$r_a = \frac{\ln\left(\frac{z_m - d}{z_{om}}\right) \ln\left(\frac{z_h - d}{z_{oh}}\right)}{k^2 W_z} \quad (\text{S58})$$

where  $z_m$ ,  $z_h$  are the height of wind and humidity respectively measurements, (usually equal to  $2\text{m}$ ),  $d = 2h/3$  – where  $h$  is crop height (usually equal to  $0.12\text{m}$ ),  $z_{om} = 0.123h$  and  $z_{oh} = 0.1z_{om}$ ,  $k$  is equal to  $0.41$  and  $W_z$  is the wind speed at height  $z$  in  $\text{m}/\text{s}$ .

$$r_s = \frac{r_1}{\text{LAI}_{\text{active}}} \quad (\text{S59})$$

where  $r_s$  is bulk surface resistance,  $r_1$  is bulk stomatal resistance of the well-illuminated leaf (usually equal to  $100\text{s}/\text{m}$ ) and  $\text{LAI}_{\text{active}} = 0.5 \text{ LAI}$  (leaf area index) and for a typical grassland is equal to 24 times the grass height ( $\text{LAI} = 24 \cdot h$ ).

The second component is given by the following equation [36]:

$$\text{DE} = \frac{0.757}{1 + e^{2.74 - 16.67(W_{\text{vol}} - 0.1)}} \quad (\text{S60})$$

where  $W_{\text{vol}}$  is volumetric moisture of the surface layer, ranging from  $0.10$  to  $0.50$ , with the latter being the starting value when the index is computed for the first time after the snowmelt.

The third and final component is computed as follows [36]:

$$P_i = 5.612 \left[ 1 - e^{\frac{-P}{5.612}} \right] \quad (\text{S61})$$

where  $P_i$  is the remaining water amount in the surface layer and  $P$  is the precipitation depth in  $\text{mm}$ .

## S2.13 KBDI original equation

KBDI components can be computed as follows [37-40]:

$$Q = \text{KBDI}_{t-1} - \frac{10}{25.4} P_{\text{net}} \quad (\text{S62})$$

where KBDI is the Keetch and Byram drought index on day  $t$ ,  $dt$  is the time increment in days, set to  $1$ ,  $P_a$  is the mean annual precipitation in  $\text{mm}$ ,  $Q$  is the previous day's index and  $P_{\text{net}}$  is net precipitation depth

computed as shown in Eq. (S63):

$$P_{\text{net}} = P - \text{Int} - \text{Run} \quad (\text{S63})$$

where P is the precipitation in mm, Int is interception and Run is the runoff in mm.

The original equation is presented below:

$$\text{KBDI}_t = Q + \frac{(800-Q)(0.968e^{0.0486T}-8.3) dt}{10^3(1+10.88e^{-0.0441Pa})} \quad (\text{S64})$$

$$Q = \text{KBDI}_{t-1} - 100P_{\text{net}} \quad (\text{S65})$$

The Modified version is included below, although the following equation produces different index ranges:

$$\text{KBDI}_{\text{mt}} = Q + \frac{(203.2-Q)(0.968e^{0.0875T+1.5552}-8.3) dt}{10^3(1+10.88e^{-0.001736Pa})} \quad (\text{S66})$$

## S2.14 SDI calculation

Hydrological parameters included in SDI can be estimated as follows [41-43]:

$$P_{\text{net}} = P - \text{Int} - \text{Run} \quad (\text{S67})$$

$$\text{Int} = R \bullet P, \text{ if } R \bullet P - \text{CW}_{t-1} \leq C \quad (\text{S68})$$

$$\text{Int} = C - \text{CW}_{t-1}, \text{ if } R \bullet P + \text{CW}_{t-1} > C \quad (\text{S69})$$

$$\text{CW}_t = \text{CW}_{t-1} + \text{Int} - W, \text{ if } P > 0 \quad (\text{S70})$$

$$\text{CW}_t = 0, \text{ if } P = 0 \quad (\text{S71})$$

$$\text{Run} = \text{FR} \bullet P \quad (\text{S72})$$

where Int is the interception, R is the canopy rainfall interception fraction, P is the precipitation height, C is Canopy storage capacity, CW is the canopy water storage on day t, W is Canopy loss per wet day, FR is flash runoff fraction and Run is the runoff. Finally, the evapotranspiration is considered as a linear equation related to maximum temperature, pan-evaporation and mean monthly daily maximum temperature:

$$\text{ET} = a_i T_{\text{max}} + b_i \quad (\text{S73})$$

where a and b can be estimated through regression. However, ET can be approximated through the Penman equation [19].

## S2.15 Palmer index calculations

The computational procedures starts with the estimation of current moisture anomaly on month 'i' ( $Z_i$ ):

$$Z_i = K_i (P - P_m) \quad (\text{S74})$$

where K is the climatic weighting factor on month i, P is the monthly precipitation and  $P_m$  is the Climatic Appropriate For Existing Conditions (CAFEC) precipitation. The calculating procedure for  $P_m$  is shown below:

$$P_m = \alpha_i \text{ETP} + \beta_i \text{PR} + \gamma_i \text{PRO} - \delta_i \text{PL} \quad (\text{S75})$$

where ETP is potential evapotranspiration, PR is potential recharge, PRO is potential runoff, PL is potential loss and  $\alpha, \beta, \gamma, \delta$  are empirical coefficients described further below. All the components of equation 99 are average values for the month of the calculations. ETP can be estimated in many ways – as already described in the current study – however Palmer uses Thornthwaite's equation [44].

$$\text{PR} = \text{AWC} - S \quad (\text{S76})$$

where S is the sum of the amounts of water in the surface and the underneath layers measured at field and AWC is the available water capacity of the soil system that plants have access to and can either be measured or calculated by the following formula [19]:

$$AWC = 1000(\theta_{FC} - \theta_{WP})Z_e \quad (S77)$$

where  $\theta_{FC}$ ,  $\theta_{WP}$  are soil water content at field capacity and at wilting point respectively and  $Z_e$  is the depth of the surface soil layer – typically between 0.10 and 0.15 meters. The  $\theta_{FC} - \theta_{WP}$  can be estimated as in line with Table S38 [19].

$$PRO = AWC - PR = S = S_s + S_u \quad (S78)$$

$$PL = \min(ETP, S_s) + [ETP - \min(ETP, S_s)] \frac{S_u}{AWC} \quad (S79)$$

where  $S_s$ ,  $S_u$  are the amount of water in the surface and in the underneath layers respectively.

$$\alpha_i = \frac{ETR_i}{ETP_i} \quad (S80)$$

$$\beta_i = \frac{R_i}{PR_i} \quad (S81)$$

$$\gamma_i = \frac{RO_i}{PRO_i} \quad (S82)$$

$$\delta_i = \frac{L_i}{PL_i} \quad (S83)$$

where ETR is real evapotranspiration, R is the recharge, RO is the runoff and L is the total moisture loss. Actual evapotranspiration can be estimated from potential evapotranspiration with the following formulas [45]:

$$ETR = ETP, \text{ if } S \geq \theta_{FC} \quad (S84)$$

$$ETR = \left[ \frac{S - \theta_{FC}}{\theta_{FC} - \theta_{WP}} \right] ETP, \text{ if } \theta_{WP} < S < \theta_{FC} \quad (S85)$$

$$ETR = 0, \text{ if } S \leq \theta_{WP} \quad (S86)$$

A plethora of different approaches is documented in the literature for estimating recharge (R), most of them including field measurements [46]. A simple method is described by the following equation [47]:

$$R = S_y \frac{dh}{dt} = S_y \frac{\Delta h}{\Delta t} \quad (S87)$$

where  $S_y$  is specific yield that can be estimated from Table 2 in Healy and Cook (2002) [47], h is water table's height and has to be measured on field t represents time while d and  $\Delta$  stand for changing rates. Finally, runoff can be either measured or estimated through the water balance equation [48]:

$$RO = R - ET_g - \Delta S_g \quad (S88)$$

where  $ET_g$  is the evapotranspiration of groundwater and has to be measured and  $\Delta S_g$  represents the changes in water storage and must be estimated. Accordingly, total loss can be computed as the sum of surface and underground loss [44,49]:

$$L = [(ETP - P) - \min(S_s, (ETP - P))] \frac{S_u}{AWC} \quad (S89)$$

The factor K from equation 98 can be calculated as follows [44,49]:

$$K_j = \frac{17.67K'}{\sum_{i=1}^{12} D_i K'_i} \quad (S90)$$

where K is the factor as in equation S74 for month j, D is the average monthly value of the P-P<sub>m</sub> (as in equation 98) for month i - including historical values of P - P<sub>m</sub> from previous years for month i - while K' values can be estimated as follows:

$$K' = 1.5 \log_{10} \left( \frac{ETP + R + RO}{P + L} + 2.8 \right) + 0.5 \quad (S91)$$

## S2.16 RDI modifications

The two modifications of the index are presented as follows [50]:

$$RDI_{n,k} = \frac{RDI_k}{RDI_{k,m}} - 1 \quad (S92a)$$

where  $RDI_{n,k}$  is the normalized reconnaissance drought index for month  $k$ ,  $RDI$  is as in the original equation and  $RDI_{k,m}$  is the average value of  $RDI_k$  for the  $k$ -th month of all years with available historical data. Finally, the third version of the index is relied on the satisfactory hypothesis that  $RDI$  follows a lognormal distribution, as presented below [50,51]:

$$RDI_{s,k} = \frac{\ln\left(\frac{RDI_k}{\mu}\right)}{\sigma} \quad (S92b)$$

where  $\mu = \sum_{i=1}^n \frac{\ln(RDI_{k,i})}{n}$  and  $\sigma = \sqrt{\sum_{i=1}^n \frac{[\ln(RDI_{k,i}) - \mu]^2}{n}}$  are mean value and standard deviation for the lognormal distribution.

### S2.17 Darcy's law calculations

The following procedure leads to the estimation of Darcy's law components [52]:

$$\psi_L = d(\omega_L - 1) \quad (S93a)$$

where  $d$  is a capacitance of water volume in turgid leaf that can be approximated on average by 7.5 and  $\omega_L$  is relative water content estimated as follows [53]:

$$\omega_L = \frac{FW - DW}{TW - DW} \quad (S93b)$$

where  $FW$ ,  $DW$  and  $TW$  are fresh, dry and turgid respectively weights that have to be measured experimentally, with  $0 < \omega_L < 1$ .

$$\psi_s = \rho \cdot g \cdot z \quad (S93c)$$

where  $z$  is the height of measurement from ground level – which can be replaced by tree height –  $\rho$  is water density equal to 1000 kg/m<sup>3</sup> and  $g$  is the acceleration due to gravity equal to 9.819 m/s<sup>2</sup>.

### S2.18 FPI index and modified versions calculations

The computations start with the estimation of live fuel moisture for pixel 'p' ( $LL_p$ )

$$LL_p = RG \frac{LL_{fm}}{100} \quad (S94)$$

where  $LL_p$  stands for live fuel moisture for pixel  $p$ ,  $RG$  is relative greenness and  $LL_{fm}$  can be estimated through Table S12.

$$DL_p = \left(1 - \frac{RG}{100}\right) LL_{fm} + DL_{fm} \quad (S95)$$

where  $DL_p$  is dead fuel load for pixel  $p$ ,  $DL_{fm}$  is dead fuel load for the fuel model from Table S12.

$$L_f = \frac{LL_p}{LL_{fm} + DL_{fm}} \quad (S96)$$

$$D_f = \frac{DL_p}{LL_{fm} + DL_{fm}} \quad (S97)$$

where  $L_f$  and  $D_f$  are the fractions of total fuel model load that is live and dead respectively. Afterwards, the fractional 10-hour fuel moisture must be calculated:

$$TN_f = \frac{FM_{10}}{MX_d} \quad (S98)$$

where  $MX_d$  is extinction moisture from Table S41 and  $FM_{10}$  is the NFDRS 10-hour fuel moisture content calculates as follows [54,55]:

$$FM_{10} = 1.28 m_{f-a} \quad (S99)$$

where  $m_{f-a}$  is equilibrium moisture content with  $T$  and  $RH$  being inserted after the corrections in Table S42.

$$FPI_u = 100 - (RG \cdot L_f + TN_f \cdot D_f \cdot 100) \quad (S100)$$

$$FPI_{\max} = 100 - 2 \frac{100}{MX_d} \quad (S101)$$

$$FPI = FPI_u + \frac{200 FPI_u}{MX_d FPI_m} \quad (S102)$$

where  $FPI_u$  is the uncorrected FPI,  $FPI_{\max}$  is the uncorrected maximum value of FPI and all others as in previous equations. The index ranges from 1 to 100, with high fire risk been observed at values greater than 80, however, clouds and/or snow can cause FPI drop to 0 [56]. Another version of the index is found in the respective literature, while the computational process is presented below [57]:

$$LR = \frac{RG \cdot MLR}{100} \quad (S103)$$

where LR is live ratio and MLR is the maximum live ratio, calculated as follows:

$$MLR = 35 + \frac{45}{36.8} (NDVI_{\max} 100 - 62.4) \quad (S104)$$

$$FMR_{10} = FM_{10} + (MX_D - FM_{10}) R_f \quad (S105)$$

where  $FMR_{10}$  is the 10-hour fuel moisture ratio,  $FM_{10}$  and  $MX_d$  as above respectively.  $R_f$  is a rain factor from 0 to 1 depending on the amount of rain needed to wet small dead fuels to extinction moisture.

$$TN_f = \frac{FMR_{10} - 2}{MX_d - 2} \quad (S106)$$

$$FPI_{m1} = 100(1 - TN_f)(1 - LR) \quad (S107)$$

where  $TN_f$  is fractional 10-hour fuel moisture and  $FPI_{m1}$  is the modified version of FPI.

Another modification of the FPI was proposed, in order to simplify the calculation procedure as follows [58]:

$$FPI_{m2} = 100(1 - FMR_{10})(1 - VC) \quad (S108)$$

where  $FPI_{m2}$  is the second modification of the FPI,  $FMR_{10}$  represents the 10-hour fuel moisture ratio and VC is the percentage of vegetation cover (0-1).

$$FMR_{10} = \frac{FM_{10}}{MX_D} \quad (S109)$$

$$VC = [0.25 + 0.5 \frac{NDVI_{\max}}{NDVI_{abs, \max}}] RG \quad (S110)$$

where  $NDVI_{\max}$  is the maximum NDVI for the location in which FPI is estimated,  $NDVI_{abs, \max}$  is the maximum NDVI of all the locations bordering the selected area. Instead of NDVI, other relevant indices can be used, such as NDWI (Huesca et al. 2009).

### S3. Nomenclature

| Symbol     | Description               | Unit |
|------------|---------------------------|------|
| T          | Dry bulb air temperature  | °C   |
| RH         | Relative humidity         | %    |
| W          | Wind speed                | km/h |
| P          | Precipitation height      | mm   |
| $\Delta e$ | Vapor pressure deficit    | hPa  |
| N          | Number of days since rain | -    |
| C          | Degree of curing          | %    |
| Q          | Fuel quantity             | t/ha |

|      |                         |                                |
|------|-------------------------|--------------------------------|
| lat  | Latitude                | degrees                        |
| E    | Evaporation             | mm                             |
| ETP  | Potential               | mm                             |
| ETR  | Real evapotranspiration | mm                             |
| r    | Water reserve           | mm                             |
| Tdew | Dew point temperature   | °C                             |
| Pnet | Net precipitation       | mm                             |
| LAI  | Leaf area index         | m <sup>2</sup> /m <sup>2</sup> |
| LAD  | Leaf area density       | m <sup>2</sup> /m <sup>3</sup> |
| Rg   | Global daily solar      | W/m <sup>2</sup>               |
| Epot | Potential evapotration  | mm                             |
| Rn   | Net radiation           | W/m <sup>2</sup>               |
| Int  | Interception            | mm                             |
| Run  | Runoff                  | mm                             |
| R    | Recharge                | mm                             |

## References

1. Fosberg, M.A. *Weather in Wildland Fire Management: The Fire Weather Index*; US For Serv Reprints of articles by FS employees: Ogden, Utah, USA: 1978. Available online: <https://agris.fao.org/agris-search/search.do?recordID=US201302440660> (accessed on 13 March 2022)
2. Fosberg, M.A.; Rothermel, R.C.; Andrews, P.L. Moisture content calculations for 1000-hour timelag fuels. *For. Sci.* **1981**, *27*, 19–26. Available online: [https://www.fs.fed.us/psw/publications/fosberg/psw\\_1981\\_fosberg001.pdf](https://www.fs.fed.us/psw/publications/fosberg/psw_1981_fosberg001.pdf) (accessed on 13 March 2022).
3. Noble, I.R.; Bary, G.A.V.; Gill, A.M. McArthur's fire-danger meters expressed as equations. *Aust. J. Ecol.* **1980**, *5*, 201–203. <https://doi.org/10.1111/j.1442-9993.1980.tb01243.x>.
4. Griffiths, D. Improved Formula for the Drought Factor in McArthur's Forest Fire Danger Meter. *Aust. For.* **1999**, *62*, 202–206. <https://doi.org/10.1080/00049158.1999.10674783>.
5. Beck, J.A. Equations for the Forest Fire Behaviour Tables for Western Australia. CALM Science 1. 1995. pp. 325–348. Available online: [https://www.victoriasforestryheritage.org.au/pinefire/Beck\\_1995\\_EquationsForTheForestFireBehaviourTablesForWesternAustralia.pdf](https://www.victoriasforestryheritage.org.au/pinefire/Beck_1995_EquationsForTheForestFireBehaviourTablesForWesternAustralia.pdf) (accessed on 5 May 2022).
6. Matthews, Stuart. A comparison of fire danger rating systems for use in forests. *Aust. Meteorol. Oceanogr. J.* **2009**, *58*, 41–48. <https://doi.org/10.22499/2.5801.005>.
7. Meikle, S.; Heine, J. A Fire Danger Index System for the Transvaal Lowveld and Adjoining Escarpment Areas. *South Afr. For. J.* **1987**, *143*, 55–56. <https://doi.org/10.1080/00382167.1987.9630304>.
8. Gouvas, M. The South African Lowveld Fire Danger Index (LFDI) and its application advantages in Greece (in Greek). In Proceedings of 19th Hellenic Forestry Conference, Litorchoro, Pieria, Greece, 29 September–2 October 2019; pp. 268–278. Available online: [https://www.academia.edu/40551183/The\\_South\\_African\\_Lowveld\\_Fire\\_Danger\\_Index\\_LFDI\\_and\\_its\\_application\\_advantages\\_in\\_Greece\\_in\\_Greek\\_](https://www.academia.edu/40551183/The_South_African_Lowveld_Fire_Danger_Index_LFDI_and_its_application_advantages_in_Greece_in_Greek_) (accessed on 05 July 2022).
9. Setzer, A.; Pereira, M.C.; Pereira, J.R. O uso de satélites NOAA na detecção de queimadas no Brasil. *Climanálise* **1992**, *7*, 40–531992.
10. Setzer, A.W.; Sismanoglu, R.A. Risco de Fogo: Metodologia do Cálculo—Descrição sucinta da Versão 9. Instituto Nacional de Pesquisas Espaciais, 2012. Available online: [https://queimadas.dgi.inpe.br/~rqueimadas/documentos/RiscoFogo\\_Sucinto\\_20130911.pdf](https://queimadas.dgi.inpe.br/~rqueimadas/documentos/RiscoFogo_Sucinto_20130911.pdf) (accessed on 13 June 2022).

11. Setzer, A.W.; Sismanoglu, R.A.; dos Santos, J.G.M. Método do cálculo do risco de fogo do programa do INPE-Versão 11, junho/2019. CEP, 12, 010. Sao Jose dos Campos, Brasil, 2019. Available online: <http://mtc-m21c.sid.inpe.br/col/sid.inpe.br/mtc-21c/2019/11.21.11.03/doc/publicacao.pdf> (accessed on 13 June 2022).
12. Martínez Techera, C. Análisis de índices de riesgo de incendio forestal y su aplicabilidad en el Uruguay, Tesis de grado. Universidad de la República (Uruguay). Facultad de Ciencias, 2021. Available online: <https://hdl.handle.net/20.500.12008/31085> (accessed on 19 July 2022).
13. Thornthwaite, C.W. An Approach toward a Rational Classification of Climate. *Geogr. Rev.* **1948**, *38*, 55–94. <https://doi.org/10.2307/210739>.
14. Palmer, W.C.; Havens, A.V. A graphical technique for determining evapotranspiration by the thornthwaite method. *Mon. Weather Rev.* **1958**, *86*, 123–128. [https://doi.org/10.1175/1520-0493\(1958\)086<0123:AGTFDE>2.0.CO;2](https://doi.org/10.1175/1520-0493(1958)086<0123:AGTFDE>2.0.CO;2).
15. Ponce, V.M. *Engineering Hydrology: Principles and Practices* (Vol. 640); Prentice Hall: Englewood Cliffs, NJ, USA, 1989. Available online: [http://ponce.sdsu.edu/330textbook\\_hydrology\\_chapters.html](http://ponce.sdsu.edu/330textbook_hydrology_chapters.html) (accessed on 29 June 2022).
16. Sol, B. Estimation du risque météorologique d'incendies de forêts dans le sud-est de la France. *Rev. For. Française No Spécial* **1990**, 263–271. Available online: <https://hal.archives-ouvertes.fr/hal-03425206/document> (accessed on 24 April 2022).
17. Drouet, J.C. and B. Sol. Etude de nouveaux indices de risques météorologiques d'incendies de forêt en zone méditerranéenne. Rapport en 3 tomes. I.U.T., Aix en Provence, C.I.R.C.O.S.C., Valabre, Service Météorologique Interregional Sud-Est, Marseille-Marignane, France. 1988.
18. Drouet, J.C.; Sol, B. Mise au point d'un indice numérique de risque météorologique d'incendies de forêts. Dossier: Forêts et incendies 1991–1992. *Méditerranéenne* **1993**, *14*, 155–162. Available online: <https://hal.archives-ouvertes.fr/hal-03557194/document> (accessed on 20 January 2022).
19. Allen, F.R. *The Management of Risk to Society from Potential Accidents*; Elsevier Applied Science: London, UK, 1998; ISBN 97813158980701992.
20. Camia, A.; Bovio, G. Description of the indices implemented in EUDIC software for the European meteorological forest fire risk mapping, European Commission Join Research Center. Tourin, Italy: 2000, Technical Report.
21. INMG (Instituto Nacional de Meteorologia e Geofisica). *Nota explicativa sobre o Índice de Risco Meteorológico de Incêndios Rurais*; Divisão de Meteorologia Agrícola: Lisbon, Portugal, 1988.
22. Gonçalves, Z.J.; Lourenço, L. Meteorological index of forest fire risk in the portuguese mainland territory. In Proceedings of the International Conference on Forest Fire Research, Coimbra, Portugal, 1990. B.07-1/14. Available online: [https://www.researchgate.net/profile/Luciano-Lourenco/publication/313476213\\_Meteorological\\_index\\_of\\_forest\\_fire\\_risk\\_in\\_the\\_Portuguese\\_Mainland\\_Territory/links/589baf7faca2721ae1b7ab18/Meteorological-index-of-forest-fire-risk-in-the-Portuguese-Mainland-Territory.pdf](https://www.researchgate.net/profile/Luciano-Lourenco/publication/313476213_Meteorological_index_of_forest_fire_risk_in_the_Portuguese_Mainland_Territory/links/589baf7faca2721ae1b7ab18/Meteorological-index-of-forest-fire-risk-in-the-Portuguese-Mainland-Territory.pdf) (accessed on 3 April 2022).
23. Almeida, R. Noções básica de meteorologia e incêndios rurais, ISEC. Pós-Grad. *Em Riscos E Proteção Civ.* 2020. Available online: <https://fogos.icnf.pt/download/> (accessed on 13 March 2022).
24. ICONA, Manual de operaciones contra incendios forestales. Madrid. 5.1/65, 1993. Available online: <https://documentacion.fundacionmapfre.org/documentacion/publico/es/media/group/1088234.do> (accessed on 17 May 2022).
25. Spano, D.; Georgiadis, T.; Duce, P.; Rossi, F. A Fire Index for Mediterranean Vegetation Based on Micrometeorological and Ecophysiological Measurements, 2001. Available online: <https://ams.confex.com/ams/pdfpapers/65497.pdf> (accessed on 29 May 2022).
26. Sirca, C.; Spano, D.; Duce, P.; Delogu, G.; Cicalò, G.O. Performance of a newly developed integrated fire rating index in Sardinia, Italy. In Proceedings of the “Wildfire 2007—4th International Wildland Fire Conference”, Seville, Spain, 13–17 May 2007; Viegas, X.D., Eds.; Ministry of Environment, Madrid, Spain and Junta de Andalucia, Seville, Spain, 2007.
27. Sirca, C.; Salis, M.; Arca, B.; Duce, P.; Spano, D. Assessing the performance of fire danger indexes in a Mediterranean area. *Iforest Biogeosciences For.* **2018**, *11*, 563–571. <https://doi.org/10.3832/for2679-011>.
28. Käse, H. *Ein Vorschlag für eine Methode zur Bestimmung und Vorhersage der Waldbrandgefährdung mit Hilfe komplexer Kennziffern*; Akademie Verlag: Berlin, Germany, 1969.
29. Zhdanko, V.A. Scientific basis of development of regional scales and their importance for forest fire management. In *Contemporary Problems of Forest Protection from Fire and Firefighting*; Melekhov, I.S., Ed.; Lesnaya Promyshlennost' Publ.: Moscow, Russia, 1965; pp. 53–86.
30. Groisman, P.Y.; Sherstyukov, B.G.; Razuvaev, V.N.; Knight, R.W.; Enloe, J.G.; Stroumentova, N.S.; Whitfield, P.H.; Førland, E.; Hannsen-Bauer, I.; Tuomenvirta, H.; et al. Potential forest fire danger over Northern Eurasia: Changes during the 20th century. *Glob. Planet. Chang.* **2007**, *56*, 371–386. <https://doi.org/10.1016/j.gloplacha.2006.07.029>.
31. Dominic, A. Evaluation of Meteorological Forest Fire Risk Indices and Projection of fire Risk for German Federal States, 2011. Available online: [https://www.researchgate.net/publication/260487902\\_Evaluation\\_of\\_meteorological\\_forest\\_fire\\_risk\\_indices\\_and\\_projection\\_of\\_fire\\_risk\\_for\\_German\\_federal\\_states](https://www.researchgate.net/publication/260487902_Evaluation_of_meteorological_forest_fire_risk_indices_and_projection_of_fire_risk_for_German_federal_states) (accessed on 23 June 2022).
32. Vadrevu, K.P.; Ohara, T.; Justice, C. *Biomass Burning in South and Southeast Asia: Impacts on the Biosphere*; CRC Press: Boca Raton, FL, USA, 2021. Volume 2; ISBN 9780429022036. <https://doi.org/10.1201/9780429022036>.
33. WSL Swiss Federal Institute for Forest, Snow and Landscape Research. Available online: <https://wikifire.sl.ch/tiki-index515f.html?page=Introduction&structure=Fire> (accessed on 30 June 2022).
34. Penman, H.L. Physics in Agriculture. *J. Sci. Instrum.* **1948**, *25*, 425–432. <https://doi.org/10.1088/0950-7671/25/12/326>.
35. Monteith, J.L. Evaporation and surface temperature. *Q. J. R. Meteorol. Soc.* **1981**, *107*, 1–27. <https://doi.org/10.1002/qj.49710745102>.

36. Vajda, A.; Venäläinen, A.; Suomi, I.; Junila, P.; Mäkelä, H.M. Assessment of forest fire danger in a boreal forest environment: Description and evaluation of the operational system applied in Finland. *Meteorol. Appl.* **2013**, *21*, 879–887. <https://doi.org/10.1002/met.1425>.
37. Keetch, J.J.; Byram, G.M. *A Drought Index for Forest Fire Control*; USDA Forest Service, Southeast Forest Experiment Station Research Paper SE-38; Asheville, NC, USA, 1968; p. 32. Available online: [https://www.srs.fs.usda.gov/pubs/rp/rp\\_se038.pdf](https://www.srs.fs.usda.gov/pubs/rp/rp_se038.pdf) (accessed on 5 January 2022).
38. Burgan, R.E. 1988 Revisions to the 1978 National Fire-Danger Rating System. USDA Forest Service, Southeastern Forest Experiment Station, Research Paper SE-273, Asheville, North Carolina. 1988; p. 39. Available online: [https://www.srs.fs.usda.gov/pubs/rp/rp\\_se273.pdf](https://www.srs.fs.usda.gov/pubs/rp/rp_se273.pdf) (accessed on 18 December 2021).
39. Dowdy, A.J.; Mills, G.A.; Finkele, K.; De Groot, W. *Australian Fire Weather as Represented by the McArthur Forest Fire Danger Index and the Canadian Forest Fire Weather Index* (p. 91); Melbourne: Centre for Australian Weather and Climate Research; 2009. Available online: [https://www.cawcr.gov.au/technical-reports/CTR\\_010.pdf](https://www.cawcr.gov.au/technical-reports/CTR_010.pdf) (accessed on 8 June 2022).
40. Pagnon Eriksson, C.; Johansson, N. Review of wildfire indices: Indices applicable for a Swedish context. Division of Fire Safety Engineering, Lund, Sweden: **2020**, TVBB, No. 3233. Available online: [https://lucris.lub.lu.se/ws/portal-files/portal/87339976/Review\\_of\\_wildfire\\_indices\\_Indices\\_applicable\\_for\\_a\\_Swedish\\_context.pdf](https://lucris.lub.lu.se/ws/portal-files/portal/87339976/Review_of_wildfire_indices_Indices_applicable_for_a_Swedish_context.pdf) (accessed on 15 April 2022).
41. Mount, A.B. *The Derivation and Testing of a Soil Dryness Index Using Run-Off Data*; Bull. 4; Forestry Commission, Tasmania, Australia: 1972. ISBN 072460006X, 30p.
42. Burrows, N.D. *The Soil Dryness Index for Use in Fire Control in the South-West of Western Australia*; Technical Report; Western Australian Department of Conservation and Land Management: Joondalup, Western Australia: 1987. Available online: <https://library.dbca.wa.gov.au/static/Journals/080075/080075-17.pdf> (accessed on 13 March 2022).
43. Kumar, V.; Dharssi, I. Sources of soil dryness measures and forecasts for fire danger rating (Vol. 15, pp. 2729–2746), 1987. Available online: <https://www.bnhcrc.com.au/sites/default/files/managed/downloads/brr-009.pdf> (accessed on 17 September 2022).
44. Palmer, W.C. *Meteorological drought* (Vol. 30); US Department of Commerce, Weather Bureau, Washington, DC, USA: 1965. Available online: [https://www.droughtmanagement.info/literature/USWB\\_Meteorological\\_Drought\\_1965.pdf](https://www.droughtmanagement.info/literature/USWB_Meteorological_Drought_1965.pdf) (accessed on 20 July 2022).
45. Bergström, S. The HBV model—Its structure and applications. SMHI Reports RH, No. 4, Norrköping, 1992. Available online: [https://www.smhi.se/polopoly\\_fs/1.83592!/Menu/general/extGroup/attachmentColHold/main-Col1/file/RH\\_4.pdf](https://www.smhi.se/polopoly_fs/1.83592!/Menu/general/extGroup/attachmentColHold/main-Col1/file/RH_4.pdf) (accessed on 08 June 2022).
46. Nimmo, J.R.; Healy, R.W.; Stonestrom, D.A. *Aquifer Recharge*, IN *Encyclopedia of Hydrological Sciences*; Anderson, M.G., Ed.; John Wiley & Sons Ltd.: Hoboken, NJ, USA, 2005; ISBN 0-471-49103-9/2005.
47. Healy, R.W.; Cook, P. Using groundwater levels to estimate recharge. *Hydrogeol. J.* **2002**, *10*, 91–109. <https://doi.org/10.1007/s10040-001-0178-0>.
48. Schicht, R.J.; Walton, W.C. 1961. Hydrologic budgets for three small watersheds in Illinois. *Illinois State Water Survey. Rep. Invest. Urbana, Illinois, USA, 1961*, 40, p. 40. Available online: <https://www.isws.illinois.edu/pub-doc/RI/ISWSRI-40.pdf> (accessed 5 January 2022).
49. Alley, W.M. The Palmer drought severity index: Limitations and assumptions. *J. Appl. Meteorol. Climatol.* **1984**, *23*, 1100–1109. [https://doi.org/10.1175/1520-0450\(1984\)023<1100:TPDSIL>2.0.CO;2](https://doi.org/10.1175/1520-0450(1984)023<1100:TPDSIL>2.0.CO;2).
50. Tsakiris, G.; Vangelis, H. Establishing a drought index incorporating evapotranspiration. *Eur. Water* **2005**, *9*, 3–11 Available online: [https://www.ewra.net/ew/pdf/EW\\_2005\\_9-10\\_01.pdf](https://www.ewra.net/ew/pdf/EW_2005_9-10_01.pdf) (accessed on 24 June 2022).
51. Tigkas, D.; Vangelis, H.; Tsakiris, G. The RDI as a composite climatic index. *Eur. Water* **2013**, *41*, 17–22. Available online: [https://www.ewra.net/ew/pdf/EW\\_2013\\_41\\_02.pdf](https://www.ewra.net/ew/pdf/EW_2013_41_02.pdf) (accessed on 21 June 2022).
52. Edwards, W.R.N.; Jarvis, P.G.; Landsberg, J.J.; Talbot, H. A dynamic model for studying flow of water in single trees. *Tree Physiol.* **1986**, *1*, 309–324. <https://doi.org/10.1093/treephys/1.3.309>.
53. Arndt, N.; Vacik, H.; Koch, V.; Arpacı, A.; Gossow, H. Modeling human-caused forest fire ignition for assessing forest fire danger in Austria. *Iforest Biogeosci. For.* **2013**, *6*, 315–325. <https://doi.org/10.3832/ifer0936-006>.
54. Bradshaw, L.; Deeming, J.E.; Burgan, R.E.; Cohen, J.D. 1978-National Fire-Danger Rating System—Technical Documentation. Gen. Tech. Rep. INT 169. Intermountain Forest and Range Experiment Station, Forest Service, U.S. Department of Agriculture, Ogden, Utah, USA: 1983; 44p. Available online: [https://www.fs.fed.us/rm/pubs\\_int/int\\_gtr169.pdf](https://www.fs.fed.us/rm/pubs_int/int_gtr169.pdf) (accessed on 13 March 2022).
55. Cohen, J.D.; Deeming, J.E. *The National Fire Danger Rating System: Basic Equations* (General Technical Report PSW-GTR-82); U.S. Department of Agriculture, Forest Service: Berkeley, CA, USA, 1985. <https://doi.org/10.2737/PSW-GTR-82>.
56. Burgan, R.; Klaver, R.; Klaver, J. Fuel Models and Fire Potential from Satellite and Surface Observations. *Int. J. Wildland Fire* **1998**, *8*, 159–170. <https://doi.org/10.1071/wf9980159>.
57. Sudiana, D.; Kuze, H.; Takeuchi, N.; Burgan, R.E. Indonesian Forest Fire—A Quantitative Assessment. In Proceedings of the 12th Indonesian Scientific Meeting, Osaka University, September 2003. 2003. Available online: <https://staff.ui.ac.id/system/files/users/dodi.sudiana/publication/ti-12-indonesianforestfirequantitativeassessment.pdf> (accessed on 28 June 2022).
58. Huesca, M.; Litago, J.; Palacios-Orueta, A.; Montes, F.; Sebastián-López, A.; Escribano, P. Assessment of forest fire seasonality using MODIS fire potential: A time series approach. *Agric. For. Meteorol.* **2009**, *149*, 1946–1955. <https://doi.org/10.1016/j.agrformet.2009.06.022>.
